# Supplementary material for: Resource Screening and Inheritance Analysis of Fusarium oxysporum sp. conglutinans Race 2 Resistance in Cabbage (Brassica oleracea var. capitata)
Source: MDPI journal article supplement (doi:10.3390/genes13091590), 2022-09-04
Supplement: s1 [file s1]

**Table S1.** Detailed information and resistance evaluation of 166 tested cabbage accessions.

| Code | Accession name | Origin        | Season        | Maturity  | Head shape | Leaf color | DI value of race 1 | Resistance level of race 1 | DI value of race 2 | Resistance level of race 2 |
|------|----------------|---------------|---------------|-----------|------------|------------|--------------------|----------------------------|--------------------|----------------------------|
| FW1  | BI-16          | USA           | Autumn        | Mid-early | Round      | Gray       | 0.00±0.00          | HR                         | 0.00±0.00          | HR                         |
| FW2  | 96-100         | India         | Autumn        | Early     | Round      | Gray green | 0.00±0.00          | HR                         | 81.33±2.31         | HS                         |
| FW3  | 01-20          | Canada        | Spring        | Early     | Round      | Green      | 92.00±4.00         | HS                         | 86.67±2.31         | HS                         |
| FW4  | 20-2-5         | China         | Autumn        | Late      | Flat       | Gray green | 42.67±2.31         | MR                         | 100.00±0.00        | HS                         |
| FW5  | 23202          | China         | Autumn        | Late      | Flat       | Gray green | 89.33±6.11         | HS                         | 100.00±0.00        | HS                         |
| FW6  | 8020           | China         | Autumn        | Mid-late  | Flat       | Gray green | 80.00±6.93         | HS                         | 100.00±0.00        | HS                         |
| FW7  | 8282           | Japan         | Autumn        | Mid-late  | Flat       | Green      | 69.33±2.31         | S                          | 100.00±0.00        | HS                         |
| FW8  | 21-3           | China         | Autumn        | Mid-late  | Flat       | Gray green | 100.00±0.00        | HS                         | 100.00±0.00        | HS                         |
| FW9  | 2-18-1         | China         | Autumn        | Late      | Flat       | Green      | 100.00±0.00        | HS                         | 100.00±0.00        | HS                         |
| FW10 | XF             | Taiwan, China | Autumn        | Mid-late  | Flat       | Gray green | 58.67±2.31         | S                          | 50.67±6.11         | S                          |
| FW11 | T41            | Taiwan, China | Autumn        | Mid-late  | Flat       | Dark green | 45.33±6.11         | MR                         | 82.67±6.11         | HS                         |
| FW12 | QD             | Japan         | Autumn        | Late      | Flat       | Gray       | 0.00±0.00          | HR                         | 0.00±0.00          | HR                         |
| FW13 | 24-5-3         | China         | Autumn        | Late      | Flat       | Green      | 24.00±0.00         | R                          | 40.00±0.00         | MR                         |
| FW14 | MD             | Japan         | Autumn        | Late      | Flat       | Gray green | 0.00±0.00          | HR                         | 0.00±0.00          | HR                         |
| FW15 | XJ253          | Japan         | Autumn        | Mid-late  | Flat       | Dark green | 85.67±6.03         | HS                         | 81.33±4.62         | HS                         |
| FW16 | SLS288         | Japan         | Autumn        | Late      | Flat       | Dark green | 85.33±2.31         | HS                         | 100.00±0.00        | HS                         |
| FW17 | MWT310         | Japan         | Autumn        | Late      | Flat       | Dark green | 0.00±0.00          | HR                         | 0.00±0.00          | HR                         |
| FW18 | YF             | Japan         | Overwintering | Medium    | Round      | Green      | 0.00±0.00          | HR                         | 86.67±2.31         | HR                         |
| FW19 | PT             | Netherlands   | Overwintering | Early     | Round      | Dark green | 93.33±6.11         | HS                         | 98.67±2.31         | HS                         |
| FW20 | 1039           | Netherlands   | Overwintering | Medium    | Round      | Dark green | 48.00±6.93         | MR                         | 38.67±6.11         | MR                         |
| FW21 | HN7            | Korea         | Autumn        | Early     | Round      | Green      | 47.00±1.73         | MR                         | 50.67±2.31         | S                          |
| FW22 | T4             | Korea         | Spring        | Early     | Round      | Dark green | 65.33±2.31         | S                          | 82.67±6.11         | HS                         |
| FW23 | ZQ             | Japan         | Autumn        | Early     | Round      | Gray green | 0.00±0.00          | HR                         | 0.00±0.00          | HR                         |
| FW24 | 96-109         | Denmark       | Autumn        | Mid-early | Round      | Dark green | 50.00±2.00         | S                          | 42.67±2.31         | MR                         |
| FW25 | XQ             | Korea         | Autumn        | Mid-early | Round      | Gray       | 0.00±0.00          | HR                         | 0.00±0.00          | HR                         |
| FW26 | CB201          | Thailand      | Autumn        | Early     | Round      | Dark green | 84.33±4.04         | HS                         | 58.67±6.11         | S                          |
| FW27 | LQDH           | Korea         | Autumn        | Early     | Round      | Green      | 78.33±2.89         | HS                         | 95.00±8.66         | HS                         |
| FW28 | DH811          | Netherlands   | Autumn        | Mid-early | Round      | Green      | 70.67±6.11         | HS                         | 100.00±0.00        | HS                         |
| FW29 | Globe star     | Japan         | Autumn        | Early     | Round      | Gray green | 57.11±5.75         | S                          | 84.00±4.00         | HS                         |
| FW30 | 084            | Denmark       | Spring        | Early     | Round      | Gray       | 100.00±0.00        | HS                         | 97.33±4.62         | HS                         |
| FW31 | 79-156         | Denmark       | Spring        | Early     | Round      | Gray green | 38.67±2.31         | MR                         | 41.33±5.51         | MR                         |
| FW32 | SG643          | Netherlands   | Spring        | Early     | Round      | Green      | 46.67±2.31         | MR                         | 77.33±2.31         | HS                         |
| FW33 | SJMT           | Japan         | Spring        | Early     | Round      | Green      | 0.00±0.00          | HR                         | 46.67±2.31         | MR                         |
| FW34 | Y162           | Netherlands   | Spring        | Medium    | Round      | Gray green | 0.00±0.00          | HR                         | 13.33±2.31         | R                          |
| FW35 | Y165           | Russia        | Spring        | Early     | Round      | Green      | 94.44±5.09         | HS                         | 100.00±0.00        | HS                         |
| FW36 | 650L           | Netherlands   | Spring        | Medium    | Round      | Gray green | 0.00±0.00          | HR                         | 6.67±2.31          | HR                         |

|      |          |             |               |           |       |            |            |    |             |    |
|------|----------|-------------|---------------|-----------|-------|------------|------------|----|-------------|----|
| FW37 | MWZS     | Japan       | Spring        | Mid-early | Round | Gray green | 50.67±4.04 | S  | 62.67±6.11  | S  |
| FW38 | Nball    | USA         | Spring        | Mid-early | Round | Gray green | 92.00±4.00 | HS | 97.33±4.62  | HS |
| FW39 | BNZS     | China       | Spring        | Medium    | Round | Green      | 50.67±2.31 | S  | 81.33±2.31  | HS |
| FW40 | PD       | USA         | Spring        | Mid-early | Round | Gray green | 65.33±2.31 | S  | 66.67±4.62  | S  |
| FW41 | JS       | Bulgaria    | Autumn        | Mid-early | Round | Gray green | 12.00±4.00 | R  | 44.00±4.00  | MR |
| FW42 | MGZGL    | USA         | Spring        | Early     | Round | Green      | 0.00±0.00  | HR | 46.67±2.31  | MR |
| FW43 | HY       | Japan       | Autumn        | Mid-late  | Flat  | Gray green | 46.00±1.73 | MR | 54.00±1.73  | S  |
| FW44 | Ikama266 | Japan       | Autumn        | Mid-late  | Flat  | Green      | 50.67±2.31 | S  | 41.33±2.31  | MR |
| FW45 | AQN266   | Japan       | Autumn        | Late      | Flat  | Gray green | 0.00±0.00  | HR | 6.67±2.31   | HR |
| FW46 | HT       | Japan       | Autumn        | Mid-late  | Flat  | Dark green | 0.00±0.00  | HR | 6.67±2.31   | HR |
| FW47 | YRHD     | Japan       | Autumn        | Mid-late  | Flat  | Gray green | 0.00±0.00  | HR | 8.33±2.89   | HR |
| FW48 | HN1      | Japan       | Autumn        | Late      | Flat  | Dark green | 0.00±0.00  | HR | 4.00±0.00   | HR |
| FW49 | YRRGGL   | Japan       | Autumn        | Mid-late  | Flat  | Green      | 41.33±2.31 | MR | 48.00±4.00  | MR |
| FW50 | YC       | Japan       | Autumn        | Late      | Flat  | Green      | 50.67±2.31 | S  | 85.33±2.31  | HS |
| FW51 | Gunma    | USA         | Autumn        | Late      | Flat  | Green      | 42.44±2.14 | MR | 58.33±2.89  | S  |
| FW52 | YF       | Japan       | Autumn        | Late      | Flat  | Green      | 24.00±4.00 | R  | 64.00±4.00  | S  |
| FW53 | QG384-1  | Japan       | Autumn        | Late      | Flat  | Dark green | 77.33±6.11 | HS | 94.33±2.08  | HS |
| FW54 | HB1      | Japan       | Autumn        | Late      | Flat  | Green      | 26.67±2.31 | R  | 17.33±2.31  | R  |
| FW55 | HB2F6    | Japan       | Autumn        | Late      | Flat  | Green      | 54.44±5.04 | S  | 90.00±10.00 | HS |
| FW56 | XXY      | Japan       | Autumn        | Late      | Flat  | Green      | 20.00±4.00 | R  | 33.33±5.77  | MR |
| FW57 | CLF6     | Japan       | Autumn        | Late      | Flat  | Gray green | 30.67±2.31 | MR | 13.33±2.31  | R  |
| FW58 | HB34     | Japan       | Autumn        | Mid-late  | Flat  | Dark green | 0.00±0.00  | HR | 42.67±2.31  | HR |
| FW59 | DNM      | China       | Autumn        | Late      | Flat  | Green      | 0.00±0.00  | HR | 10.67±2.31  | R  |
| FW60 | OZYQ     | Netherlands | Overwintering | Late      | Round | Green      | 88.00±4.00 | HS | 100.00±0.00 | HS |
| FW61 | HB1186   | Japan       | Autumn        | Mid-early | Round | Green      | 0.00±0.00  | HR | 0.00±0.00   | HR |
| FW62 | JB       | Japan       | Autumn        | Mid-early | Round | Green      | 8.00±0.00  | HR | 17.33±2.31  | R  |
| FW63 | TCGL     | China       | Autumn        | Late      | Flat  | Green      | 22.67±2.31 | R  | 63.33±5.77  | S  |
| FW64 | YD2      | Japan       | Overwintering | Late      | Flat  | Dark green | 56.00±4.00 | S  | 89.33±2.31  | HS |
| FW65 | HN25     | Japan       | Overwintering | Late      | Flat  | Dark green | 43.33±2.89 | MR | 81.67±5.77  | HS |
| FW66 | 308DS    | Japan       | Overwintering | Late      | Flat  | Gray       | 4.00±6.93  | HR | 0.00±0.00   | HR |
| FW67 | JLL      | Japan       | Overwintering | Late      | Flat  | Green      | 20.00±4.00 | R  | 34.67±2.31  | MR |
| FW68 | HY26     | Japan       | Overwintering | Late      | Flat  | Gray green | 36.00±0.00 | MR | 34.67±4.62  | MR |
| FW69 | YU1      | Japan       | Overwintering | Late      | Flat  | Green      | 26.67±2.31 | R  | 6.67±2.31   | HR |
| FW70 | 11-62    | Japan       | Overwintering | Late      | Flat  | Gray       | 84.00±6.93 | HS | 84.00±2.31  | HS |
| FW71 | HJJ      | Japan       | Overwintering | Late      | Flat  | Dark green | 0.00±0.00  | HR | 13.33±6.11  | R  |
| FW72 | YQ       | Japan       | Overwintering | Late      | Flat  | Dark green | 44.00±4.00 | MR | 64.00±6.93  | S  |
| FW73 | KBK      | Japan       | Overwintering | Late      | Flat  | Gray green | 53.33±2.31 | S  | 44.00±4.00  | MR |
| FW74 | YK143    | Japan       | Overwintering | Late      | Round | Green      | 97.33±2.31 | HS | 77.33±6.11  | HS |
| FW75 | E05-13   | Russia      | Overwintering | Late      | Round | Green      | 57.33±4.62 | S  | 100.00±0.00 | HS |
| FW76 | E05-17   | Russia      | Overwintering | Late      | Round | Dark green | 68.00±0.00 | S  | 78.33±5.77  | HS |
| FW77 | H4       | Japan       | Overwintering | Late      | Flat  | Green      | 10.00±3.33 | R  | 13.33±2.89  | R  |
| FW78 | 1038     | Netherlands | Overwintering | Medium    | Round | Green      | 0.00±0.00  | HR | 12.78±2.54  | R  |
| FW79 | YMS      | Netherlands | Overwintering | Late      | Round | Gray green | 0.00±0.00  | HR | 0.00±0.00   | HR |

|       |              |             |               |           |       |            |            |    |             |    |
|-------|--------------|-------------|---------------|-----------|-------|------------|------------|----|-------------|----|
| FW80  | HB48         | Japan       | Overwintering | Late      | Flat  | Dark green | 9.33±4.62  | HR | 89.33±2.31  | HR |
| FW81  | 10-511       | Netherlands | Overwintering | Late      | Round | Gray green | 54.67±2.31 | S  | 97.33±4.62  | HS |
| FW82  | H2           | China       | Spring        | Mid-early | Round | Gray green | 46.67±6.11 | MR | 64.33±0.58  | S  |
| FW83  | A221         | Japan       | Overwintering | Mid-early | Round | Dark green | 69.33±2.31 | S  | 86.67±2.31  | HS |
| FW84  | PL           | Korea       | Autumn        | Mid-early | Round | Green      | 44.00±4.00 | MR | 58.66±2.31  | S  |
| FW85  | JB           | Japan       | Autumn        | Mid-early | Round | Gray green | 22.67±2.31 | R  | 44.00±4.00  | MR |
| FW86  | YC205        | Korea       | Autumn        | Early     | Round | Gray green | 0.00±0.00  | HR | 6.67±2.31   | HR |
| FW87  | YC207        | Korea       | Autumn        | Early     | Round | Green      | 0.00±0.00  | HR | 6.67±2.31   | HR |
| FW88  | XT0102       | Korea       | Autumn        | Early     | Round | Green      | 36.00±0.00 | MR | 49.33±4.62  | MR |
| FW89  | bejo1012     | Netherlands | Autumn        | Early     | Round | Gray       | 0.00±0.00  | HR | 11.67±2.89  | R  |
| FW90  | YDWW         | Japan       | Autumn        | Early     | Round | Green      | 74.67±4.62 | HS | 65.33±8.33  | S  |
| FW91  | Y159         | Netherlands | Spring        | Early     | Round | Gray green | 50.00±2.00 | S  | 53.67±7.77  | S  |
| FW92  | JTM          | Netherlands | Spring        | Early     | Round | Green      | 0.00±0.00  | HR | 93.33±6.11  | HS |
| FW93  | Y181         | Netherlands | Spring        | Early     | Round | Green      | 45.33±2.31 | MR | 27.33±3.06  | R  |
| FW94  | MNK          | Netherlands | Spring        | Early     | Round | Gray green | 63.33±5.77 | S  | 93.33±11.55 | HS |
| FW95  | YOP          | Italia      | Spring        | Early     | Round | Green      | 53.33±4.62 | S  | 52.00±4.00  | S  |
| FW96  | TZD45A       | Thailand    | Spring        | Early     | Round | Gray green | 52.00±0.00 | S  | 77.33±2.31  | HS |
| FW97  | LY           | Japan       | Autumn        | Early     | Round | Green      | 0.00±0.00  | HR | 6.67±2.31   | HR |
| FW98  | BUSOMI       | Japan       | Autumn        | Mid-early | Round | Gray green | 77.33±2.31 | HS | 76.67±2.89  | HS |
| FW99  | lion         | Japan       | Autumn        | Mid-early | Round | Gray green | 0.00±0.00  | HR | 4.00±0.00   | HR |
| FW100 | JSGL         | Japan       | Autumn        | Mid-early | Round | Green      | 96.00±0.00 | HS | 100.00±0.00 | HS |
| FW101 | Jersey Queen | USA         | Autumn        | Late      | Flat  | Green      | 38.67±2.31 | MR | 70.00±2.00  | HS |
| FW102 | BS           | USA         | Autumn        | Late      | Flat  | Green      | 0.00±0.00  | HR | 8.89±3.85   | HR |
| FW103 | LT           | USA         | Autumn        | Late      | Flat  | Green      | 0.00±0.00  | HR | 4.67±0.58   | HR |
| FW104 | WS           | USA         | Autumn        | Late      | Flat  | Green      | 0.00±0.00  | HR | 4.00±0.00   | HR |
| FW105 | MYBQ         | China       | Autumn        | Late      | Flat  | Gray green | 20.00±4.00 | R  | 35.67±4.04  | MR |
| FW106 | HN2014Q160   | Japan       | Autumn        | Late      | Flat  | Gray green | 0.00±0.00  | HR | 6.67±2.31   | HR |
| FW107 | HN2014Q494   | Japan       | Autumn        | Late      | Flat  | Gray green | 48.00±4.00 | MR | 100.00±0.00 | HS |
| FW108 | HN2014Q495   | Japan       | Autumn        | Late      | Flat  | Gray green | 70.67±2.31 | HS | 90.67±9.24  | HS |
| FW109 | STK          | Netherlands | Autumn        | Late      | Round | Gray green | 13.33±2.31 | R  | 30.67±2.31  | MR |
| FW110 | XY6          | China       | Autumn        | Late      | Flat  | Green      | 36.00±0.00 | MR | 61.33±4.62  | S  |
| FW111 | 070          | Japan       | Autumn        | Late      | Flat  | Gray green | 0.00±0.00  | HR | 4.00±0.00   | HR |
| FW112 | 044          | Japan       | Autumn        | Late      | Flat  | Green      | 53.33±2.31 | S  | 57.33±8.33  | S  |
| FW113 | JPQ2         | China       | Autumn        | Late      | Flat  | Dark green | 55.67±4.04 | S  | 86.67±2.31  | HS |
| FW114 | JLGL         | Japan       | Autumn        | Early     | Round | Dark green | 0.00±0.00  | HR | 0.00±0.00   | HR |
| FW115 | BJGL         | Japan       | Autumn        | Early     | Round | Green      | 0.00±0.00  | HR | 17.33±2.31  | R  |
| FW116 | MYF          | Japan       | Autumn        | Early     | Round | Gray green | 12.00±0.00 | R  | 80.00±4.00  | HS |
| FW117 | JDNLB        | Japan       | Autumn        | Early     | Round | Dark green | 0.00±0.00  | HR | 6.67±2.31   | HR |
| FW118 | HNBG08       | Japan       | Autumn        | Early     | Round | Gray green | 26.67±2.31 | R  | 8.00±0.00   | HR |
| FW119 | HNBG16       | Japan       | Autumn        | Early     | Round | Green      | 0.00±0.00  | HR | 8.00±0.00   | HR |
| FW120 | HNBG18       | Japan       | Autumn        | Early     | Round | Gray green | 0.00±0.00  | HR | 14.67±2.31  | R  |
| FW121 | CF3          | China       | Autumn        | Early     | Round | Green      | 37.33±4.62 | MR | 78.67±4.62  | HS |
| FW122 | SZQ          | Japan       | Autumn        | Early     | Round | Gray green | 0.00±0.00  | HR | 4.00±0.00   | HR |

|       |                   |             |               |           |       |            |             |    |             |    |
|-------|-------------------|-------------|---------------|-----------|-------|------------|-------------|----|-------------|----|
| FW123 | 2011Q9-1          | Japan       | Autumn        | Mid-early | Round | Green      | 58.67±2.31  | S  | 71.67±7.64  | HS |
| FW124 | 2011Q16-1         | Japan       | Autumn        | Mid-early | Round | Green      | 61.33±2.31  | S  | 80.33±4.51  | HS |
| FW125 | 2011Q32-1         | Japan       | Autumn        | Early     | Round | Dark green | 0.00±0.00   | HR | 70.67±2.31  | HS |
| FW126 | 2011Q53-1         | Japan       | Autumn        | Late      | Round | Green      | 56.00±4.00  | S  | 86.67±2.31  | HS |
| FW127 | 07C1493           | Japan       | Autumn        | Mid-early | Round | Green      | 0.00±0.00   | HR | 6.67±2.31   | HR |
| FW128 | T100O             | Switzerland | Autumn        | Early     | Round | Dark green | 63.33±5.77  | S  | 94.67±4.62  | HS |
| FW129 | CH-750            | Japan       | Autumn        | Mid-early | Round | Dark green | 37.33±2.31  | MR | 14.67±2.31  | R  |
| FW130 | 894               | Japan       | Autumn        | Mid-early | Round | Green      | 0.00±0.00   | HR | 6.67±2.31   | HR |
| FW131 | HC70-1            | Japan       | Autumn        | Mid-early | Round | Gray green | 0.00±0.00   | HR | 25.33±9.24  | R  |
| FW132 | HBG-1             | Japan       | Autumn        | Early     | Round | Green      | 13.33±2.31  | R  | 21.33±2.31  | R  |
| FW133 | PPF-2             | Japan       | Autumn        | Early     | Round | Dark green | 24.00±0.00  | R  | 37.33±4.62  | MR |
| FW134 | ML-2              | Japan       | Autumn        | Early     | Round | Gray green | 0.00±0.00   | HR | 6.67±2.31   | HR |
| FW135 | 01-88             | Canada      | Spring        | Early     | Round | Green      | 100.00±0.00 | HS | 100.00±0.00 | HS |
| FW136 | ST-4              | Korea       | Spring        | Early     | Round | Dark green | 0.00±0.00   | HR | 4.00±0.00   | HR |
| FW137 | SCA026            | Korea       | Spring        | Early     | Round | Gray green | 45.33±2.31  | MR | 96.00±0.00  | HS |
| FW138 | XLN               | Japan       | Spring        | Early     | Round | Dark green | 69.33±2.31  | HR | 96.00±4.00  | HS |
| FW139 | YFJZ              | Japan       | Spring        | Early     | Round | Dark green | 80.00±0.00  | HS | 100.00±0.00 | HS |
| FW140 | JZP               | Japan       | Spring        | Early     | Round | Gray green | 44.00±0.00  | MR | 98.67±2.31  | HS |
| FW141 | 11C2425           | Japan       | Spring        | Medium    | Round | Dark green | 0.00±0.00   | HR | 13.33±2.89  | HR |
| FW142 | DC-06             | Japan       | Spring        | Mid-early | Round | Dark green | 38.67±2.31  | MR | 48.00±4.00  | MR |
| FW143 | TT8               | Netherlands | Spring        | Medium    | Round | Gray green | 37.78±3.85  | MR | 62.22±3.85  | S  |
| FW144 | FT                | Switzerland | Spring        | Early     | Round | Green      | 33.33±2.31  | MR | 48.00±4.00  | MR |
| FW145 | NC89              | Japan       | Spring        | Early     | Round | Dark green | 0.00±0.00   | HR | 5.00±0.00   | HR |
| FW146 | N139              | Japan       | Spring        | Mid-early | Round | Green      | 35.00±0.00  | MR | 30.67±6.11  | MR |
| FW147 | 07C1494           | Japan       | Spring        | Medium    | Round | Green      | 20.00±0.00  | R  | 27.33±4.04  | R  |
| FW148 | KAG733            | Japan       | Spring        | Mid-early | Round | Gray green | 66.67±2.31  | S  | 69.33±6.11  | S  |
| FW149 | Puma              | Netherlands | Spring        | Mid-early | Round | Green      | 88.00±6.93  | HS | 100.00±0.00 | HS |
| FW150 | Charmant          | Japan       | Spring        | Mid-early | Round | Gray green | 70.67±5.69  | HS | 76.00±6.93  | HS |
| FW151 | Ferry round dutch | Netherlands | Spring        | Mid-early | Round | Green      | 96.00±6.93  | HS | 4.00±0.00   | HS |
| FW152 | HNBG17            | Japan       | Spring        | Mid-early | Round | Dark green | 0.00±0.00   | HR | 6.67±2.31   | HR |
| FW153 | HNBG19            | Japan       | Spring        | Mid-early | Round | Dark green | 30.67±2.31  | MR | 84.00±4.00  | HS |
| FW154 | CGZ               | Japan       | Spring        | Early     | Round | Dark green | 33.33±6.11  | MR | 62.67±8.33  | S  |
| FW155 | XJH               | China       | Spring        | Early     | Round | Green      | 100.00±0.00 | HS | 98.67±2.31  | HS |
| FW156 | HC1               | Japan       | Overwintering | Mid-early | Round | Dark green | 0.00±0.00   | HR | 85.33±2.31  | HR |
| FW157 | 107GL             | Japan       | Overwintering | Mid-early | Round | Gray green | 0.00±0.00   | HR | 85.33±2.31  | HR |
| FW158 | ML                | Japan       | Overwintering | Mid-early | Round | Gray green | 0.00±0.00   | HR | 4.00±0.00   | HR |
| FW159 | BMT620            | Japan       | Overwintering | Mid-early | Round | Gray green | 45.33±4.62  | MR | 22.67±2.31  | R  |
| FW160 | JQ90              | Japan       | Overwintering | Early     | Round | Gray green | 0.00±0.00   | HR | 4.00±0.00   | HR |
| FW161 | 1186              | Japan       | Overwintering | Mid-early | Round | Gray green | 29.33±2.31  | R  | 62.22±3.85  | S  |
| FW162 | A1012             | Japan       | Overwintering | Mid-early | Round | Green      | 0.00±0.00   | HR | 89.33±2.31  | HR |
| FW163 | SH101             | USA         | Overwintering | Late      | Flat  | Gray green | 12.00±0.00  | R  | 22.67±2.31  | R  |
| FW164 | RG22              | China       | Overwintering | Late      | Flat  | Gray green | 17.33±2.31  | R  | 6.67±2.31   | HR |
| FW165 | JY82              | Japan       | Overwintering | Early     | Flat  | Gray green | 37.33±2.31  | MR | 22.67±2.31  | R  |

|       |      |       |        |           |       |            |            |   |            |   |
|-------|------|-------|--------|-----------|-------|------------|------------|---|------------|---|
| FW166 | H137 | Japan | Spring | Mid-early | Round | Dark green | 16.00±0.00 | R | 56.00±4.00 | S |
|-------|------|-------|--------|-----------|-------|------------|------------|---|------------|---|

Note: Disease Index data are mean ±standard deviation.
